# Supplementary material
Source: PubMed Central journal article supplement (PMC10557380)
Supplement: NIHMS1934950-supplement-supplementary_Information.pdf [file NIHMS1934950-supplement-supplementary_Information.pdf]

## Supporting Information

Molecular Determinants of Human T-cell Leukemia Virus Type 1 Gag Targeting to the Plasma Membrane for Assembly

**Dominik Herrmann<sup>a‡</sup>, Heather M. Hanson<sup>b‡</sup>, Lynne W. Zhou<sup>a</sup>, Rayna Addabbo<sup>b,c†</sup>, Nora A. Willkomm<sup>b†</sup>, Isaac Angert<sup>b,c</sup>, Joachim D. Mueller<sup>b,c</sup>, Louis M. Mansky<sup>b</sup>, and Jamil S. Saad<sup>a\*</sup>**

<sup>a</sup> Department of Microbiology, University of Alabama at Birmingham, Birmingham, AL 35294

<sup>b</sup> Institute for Molecular Virology, University of Minnesota – Twin Cities, Minneapolis, MN 55455 USA

<sup>c</sup> School of Physics and Astronomy, University of Minnesota, Minneapolis, MN 55455 USA

‡ and † Authors contributed equally to this work.

To whom correspondence should be addressed: Jamil S. Saad, Ph.D., 845 19<sup>th</sup> Street South, Birmingham, AL 35294; Phone: 205-996-9282; Fax: 205-996-4008; Email: saad@uab.edu

Running Title: Determinants of HTLV-1 Gag-membrane interactions

**Table S1.** Statistics for the HADDOCK clusters of HTLV-1 myr(-)MA<sub>99</sub> docked to IP<sub>3</sub>

|                                               |              |
|-----------------------------------------------|--------------|
| Cluster                                       | 1            |
| Number of structures in cluster               | 175          |
| HADDOCK score                                 | -126.6 ± 2.5 |
| RMSD from the overall lowest-energy structure | 0.3 ± 0.2    |
| Van der Waals energy                          | 18.3 ± 5.9   |
| Electrostatic energy                          | -781 ± 22    |
| Restraints violation energy                   | 0            |

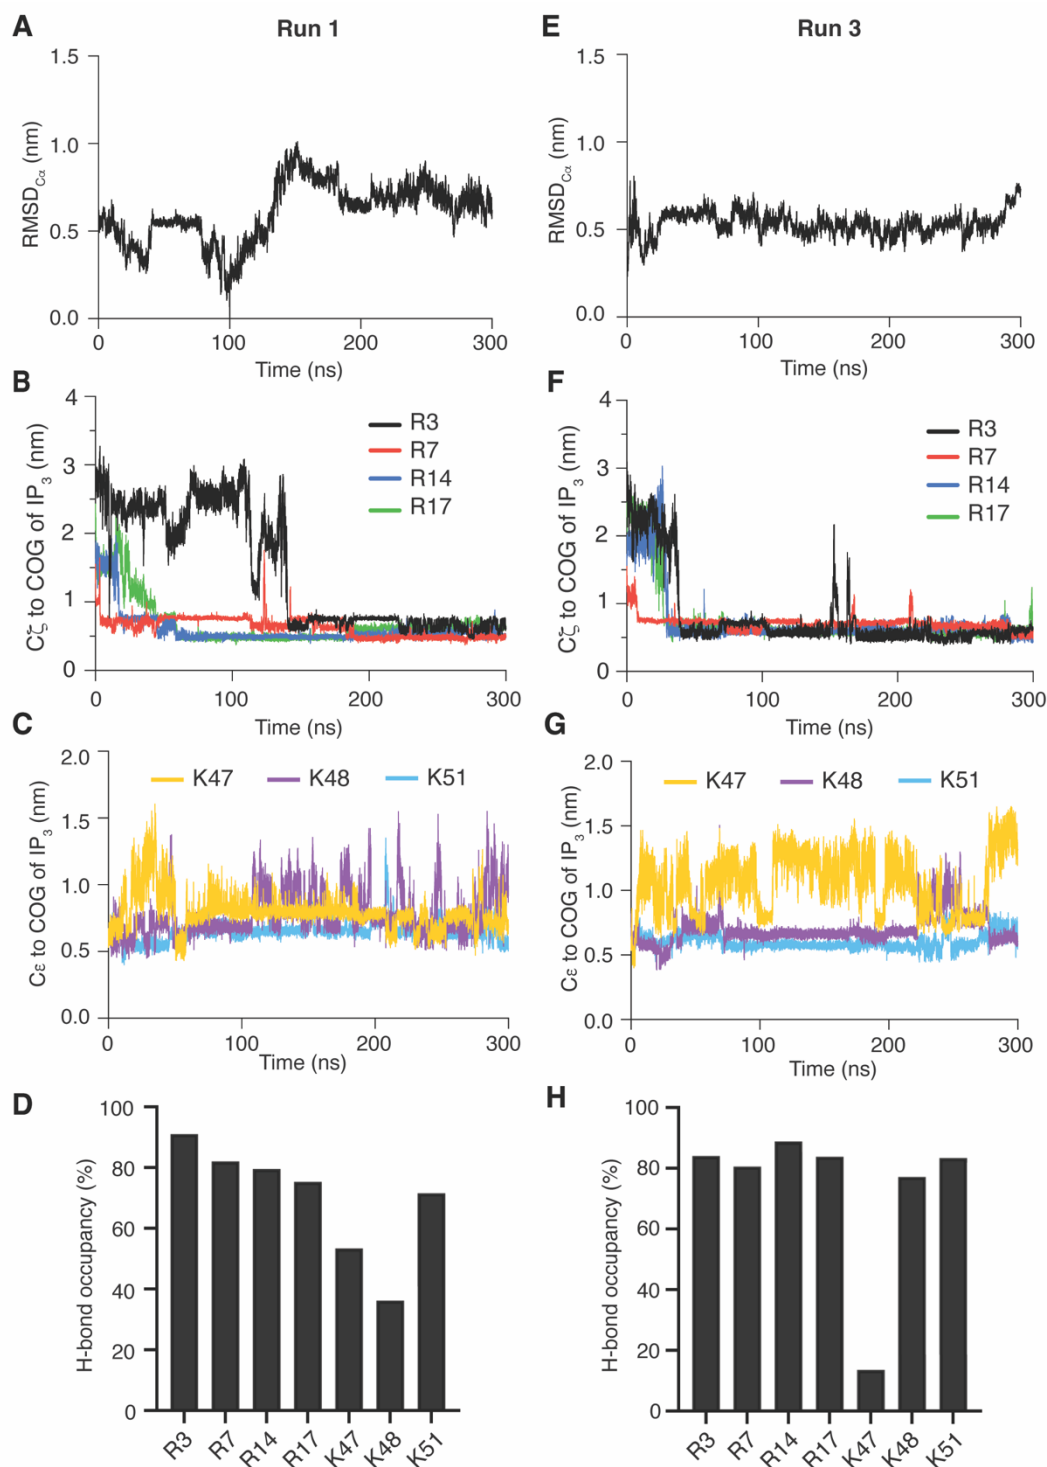

**Figure S1. MD simulations of myr(-)MA<sub>99</sub> bound to IP<sub>3</sub>.** (A-D) Analysis of run 1 and (E-F) analysis of run 3 of simulations with identical starting parameters. (A and D) RMSD values of C $\alpha$  carbons of myr(-)MA<sub>99</sub> over time. (B and F) Distance of arginine side-chain C $\zeta$  carbons to the center of geometry (COG) of IP<sub>3</sub> over time. (C and G) Distance of C $\epsilon$  lysine side-chain carbons to the COG of IP<sub>3</sub>. (D and H) H-bond occupancy of the equilibrated state (distance of all arginines to IP<sub>3</sub> < 1nm), analyzed using VMD.

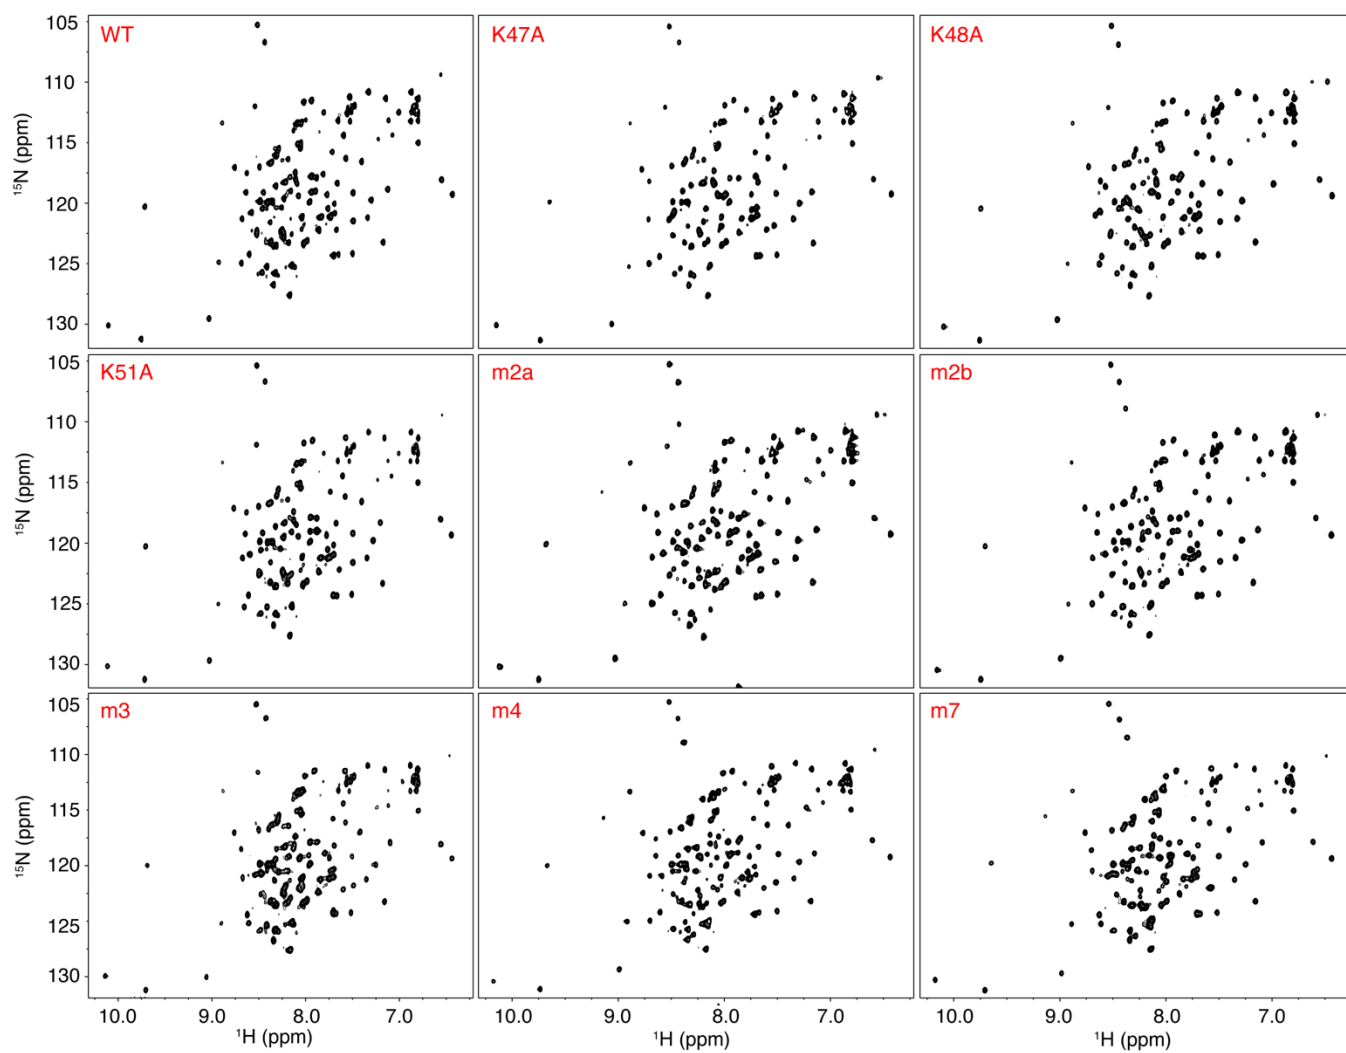

**Figure S2. NMR spectra of HTLV-1 myr(-)MA<sub>130</sub> mutants.** 2D <sup>1</sup>H-<sup>15</sup>N HSQC spectra of WT and mutant HTLV-1 myr(-)MA<sub>130</sub> proteins confirming overall fold is maintained. Mutations are indicated in the top left corner of each spectrum.

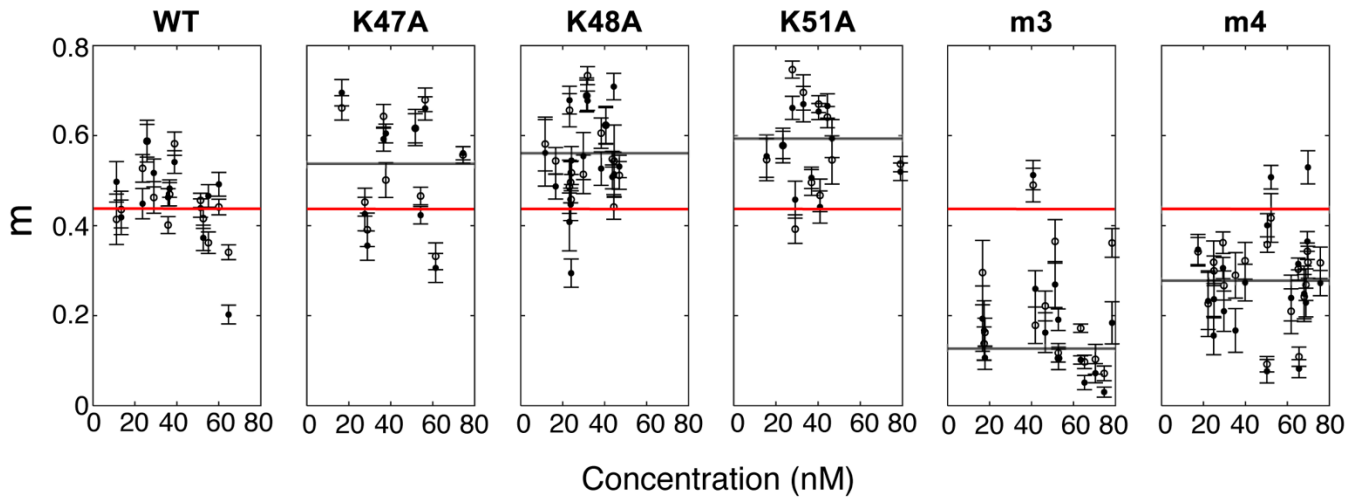

**Figure S3. Membrane intensity fractions for WT and Gag mutants.** Shown are the membrane intensity fractions ( $m$ ) for WT and Gag mutants (filled= top PM, unfilled= bottom PM) vs. cytoplasmic Gag concentration. Lines indicate the weighted average  $m$  for WT Gag-EYFP (red) and Gag mutants (black). Error bars are the standard error derived from repeated z-scan traces.
